# Supplementary material for: Catestatin peptide impedes melanoma progression and drug resistance by reprogramming oncogenic signaling pathways
Source: Research Square preprint supplement (doi:10.21203/rs.3.rs-8548714/v1), 2026-01-19
Supplement: Supplementary file 1 [file 38a36648293caf9541f471fb.docx]

**Supplementary Table 2**: Significance values of genes in primary vs metastasis of human melanoma TCGA dataset

| Gene Name | Statistical significance(primary vs. metastasis) |
| --- | --- |
| *CTGF(CCN2)* | 7.12750000020357E-07 |
| *DDIT4* | 1.057340E-03 |
| *PDGFRB* | 1.28280000000203E-06 |
| *LOXL2* | 1.159810E-01 |
