# Supplementary material for: Catestatin peptide impedes melanoma progression and drug resistance by reprogramming oncogenic signaling pathways
Source: Research Square preprint supplement (doi:10.21203/rs.3.rs-8548714/v1), 2026-01-19
Supplement: Supplementary file 2 [file 9b90cd62032a48b4302411b7.docx]

| Patient ID | Sex | Tissue type | Mutation | Treatment regime | Metastasis(yes/No-location if known) |
| --- | --- | --- | --- | --- | --- |
| K06184 | Male | Brain resection, at diagnosis was found at right calf | BRAF wildtype at diagnosis, c-kit not detected | Ipilimumab, Radiation, Pembrolizumab,Radiation again | Yes (Brain, right thigh) |
| 156681 | Female | Left forearm resection | V600E BRAF | TVEC, Ipilimumab, Decitabine, Vemurafenib. Only the left forearm did not respond. | Yes |
| 128128 | Male | Lymph node resection | Not known | Treatment naive | Yes (lymph node) |

**Supplementary Table1**: Details of melanoma patient derived cells
