# Supplementary material for: Catestatin peptide impedes melanoma progression and drug resistance by reprogramming oncogenic signaling pathways
Source: Research Square preprint supplement (doi:10.21203/rs.3.rs-8548714/v1), 2026-01-19
Supplement: Supplementary file 3 [file e0e46b893ff6beab4f026f24.docx]

**Legends to Supplementary Figures**

**Supplementary Figure 1. Anti-proliferative effects of CST on melanoma patient derived cell.**

**(A&B)** Bar graph showing cell viability assay on Human skin fibroblast (CCD1076) and patient derived cell 128128 for 120 hours in response to different concentration of CST (1 µM, 2 µM, 5 µM, and 10 µM) versus vehicle control. (**C)** Micrographs showing green-stained (with calcein AM) live 128128 cells and red-stained (with EthD-III) dead 128128 cells after treatments with CST (5 µM) versus control. Images were captured in Keyence microscope at a magnification of 10X. Scale bar: 100 µm. (**D)** Bar graph showingquantitative analysis of dead/live areas upon CST treatment in 128128 cells. (**E**) Bar graph showing relative light units from caspase 3/7 assay after treatment of 128128 cells with CST or vehicle control. Data were presented as Mean ± SEM and analyzed by Welch’s t-test (D&E). *p ≤ 0.05, **p ≤ 0.01, and ***p ≤ 0.001.

**Supplementary Figure 2. Melanoma progression inhibition in human melanoma cells upon CST treatment**

**(A) Cell viability assay of SKMEL28 cell line** by CCK-8 assay using different concentrations of CST (0.5 µM, 1 µM, 2 µM, and 5 µM) versus vehicle control for 0, 24 ,48 and 72 hours.Phase contrast imaging of Control versus CST (2 µM)-treated A375 human melanoma cells for 24 hours. Images were taken at a magnification of 20X. scale bar: 70 µm. **(B&C)** Colony formation assay in SKMEL28 cells after treatments with CST versus control and its quantitative analysis. Brightfield images were captured in of Keyence microscope at a magnification of 10X. Scale bar: 100 µm. (**D&E)** Transwell migration assay in control and CST treated SKMEL28 cells and its quantitative analysis. (**F&G)** Wound healing assay in A375 cells after treatments with CST versus vehicle control for 24 hours and its quantitative analysis.Two-way ANOVA followed by Dunnett’s multiple comparison test was used to analyze cell viability assay data. Wound healing assay was presented as Mean ± SEM and analyzed by Welch’s t-test (**C, E&G**). *p ≤ 0.05, **p ≤ 0.01, and ***p ≤ 0.001.

**Supplementary Figure 3. In vivo melanoma tumor effects upon CST treatment.**

(**A**) In vitro plasma stability of CST monitored till 24 hours. (**B**) In vivo plasma pharmacokinetics of CST till 24 hours. (**C**) Regulation of body weight by CST (10mg/kg) versus vehicle control in mice bearing B16F10 derived tumors. Data were presented as Mean ± SEM and analyzed by 2-way ANOVA with Sidak’s multiple comparison test. **(D)** Histological micrographs of hematoxylin and eosin stained liver sections in mice after treatments with CST versus vehicle control.

**Supplementary Figure 4. Molecular mechanism of CST treatment in melanoma tumor and A375 cell line.**

**(A)** Heatmap showing upregulated genes upon CST treatment with padj <0.05 in B16F10 tumor (n=4, each group) (**B)** GO analysis showing enriched upregulated pathways in B16F10 tumor in response to CST treatment. (**C)** Heatmap showing upregulated genes in A375 cells after treatments with CST with padj<0.05 (n=3, each group) (**D)** GO analysis showing enriched upregulated pathways in A375 cells upon CST treatment.

**Supplementary Figure 5. Molecular mechanism of CST treatment in Vemurafenib resistant melanoma cell A375.**

**(A)** Heatmap showing upregulated genes in A375 resistant cells upon CST treatment with padj<0.05 (n=4, each group) (**B**) GO analysis showing enriched upregulated pathways in A375 resistant cells in response to CST treatment.
